# Supplementary material for: Autophagosome development and chloroplast segmentation occur synchronously for piecemeal degradation of chloroplasts
Source: eLife. 2024 Nov 7;12:RP93232. doi: 10.7554/eLife.93232 (PMC11542923; doi:10.7554/eLife.93232)
Supplement: Figure 2—source data 1. [file elife-93232-fig2-data1.xlsx]

## Sheet: Sheet1
		Figure 2C_line profile																Figure 2A_line profile
		Distance::Distance!!R	Channel_1::mRF12-T1!!R	Channel_2::EGFP-T2!!R	Channel_3::ChloA-T2!!R		Relative											Distance::Distance!!R	Channel_1::mRF12-T1!!R	Channel_2::EGFP-T2!!R	Channel_3::ChloA-T2!!R		Relative
		µm					ATPC1-tagRFP	RBCS-GFP	Chlorophyll									µm					TOC64-mRFP	RBCS-GFP	Chlorophyll
		0	1588	408	412		0.0439427	0.0211268	0.0322202									0	5765	96	344		0.134753	0.00352941	0.0343588
		0.0248045	1411	486	116		0.0390448	0.0251657	0.00907171									0.0283412	2330	549	370		0.0544622	0.0201838	0.0369557
		0.049609	1768	92	437		0.0489236	0.00476388	0.0341753									0.0566825	2038	109	414		0.0476369	0.00400735	0.0413504
		0.0744134	1552	880	209		0.0429465	0.0455675	0.0163447									0.0850237	3191	621	328		0.0745874	0.0228309	0.0327607
		0.0992179	1552	880	209		0.0429465	0.0455675	0.0163447									0.113365	2388	126	183		0.0558179	0.00463235	0.0182781
		0.124022	1870	492	49		0.0517461	0.0254764	0.00383202									0.141706	4345	478	527		0.101561	0.0175735	0.0526368
		0.148827	1459	99	321		0.040373	0.00512635	0.0251036									0.170047	1544	87	225		0.0360899	0.00319853	0.022473
		0.173631	1337	418	531		0.0369971	0.0216446	0.0415266									0.198389	3026	394	379		0.0707307	0.0144853	0.0378546
		0.198436	2275	457	884		0.0629531	0.023664	0.0691327									0.22673	3057	330	355		0.0714553	0.0121324	0.0354575
		0.22324	1032	305	420		0.0285572	0.0157933	0.0328459									0.255071	4009	101	433		0.0937076	0.00371324	0.0432481
		0.248045	1856	529	671		0.0513587	0.0273923	0.0524752									0.283412	1829	566	245		0.0427516	0.0208088	0.0244706
		0.272849	1259	487	342		0.0348387	0.0252175	0.0267459									0.311754	1694	207	673		0.0395961	0.00761029	0.0672193
		0.297654	2884	393	383		0.0798052	0.02035	0.0299523									0.340095	2001	333	285		0.046772	0.0122426	0.0284658
		0.322458	1814	87	555		0.0501965	0.00450497	0.0434035									0.368436	2220	336	237		0.051891	0.0123529	0.0236716
		0.347263	1767	498	501		0.0488959	0.0257871	0.0391804									0.396777	1791	508	578		0.0418634	0.0186765	0.0577307
		0.372067	5410	707	312		0.149704	0.0366094	0.0243998									0.425119	2641	550	224		0.0617316	0.0202206	0.0223732
		0.396872	2052	695	381		0.0567823	0.035988	0.0297959									0.45346	1572	785	495		0.0367444	0.0288603	0.0494407
		0.421676	1606	742	495		0.0444408	0.0384217	0.0387112									0.481801	2990	812	232		0.0698892	0.0298529	0.0231722
		0.446481	1606	742	495		0.0444408	0.0384217	0.0387112									0.510142	4971	716	324		0.116194	0.0263235	0.0323612
		0.471285	1684	533	406		0.0465991	0.0275994	0.031751									0.538484	3333	677	269		0.0779066	0.0248897	0.0268678
		0.49609	1525	1395	356		0.0421993	0.0722349	0.0278408									0.566825	4014	483	141		0.0938245	0.0177574	0.0140831
		0.520894	1795	541	519		0.0496707	0.0280137	0.0405881									0.595166	4569	702	410		0.106797	0.0258088	0.0409509
		0.545699	1028	489	534		0.0284465	0.025321	0.0417612									0.623507	9130	802	561		0.213408	0.0294853	0.0560328
		0.570503	2368	2175	466		0.0655266	0.112624	0.0364433									0.651849	3983	1009	181		0.0930999	0.0370956	0.0180783
		0.595308	1138	1277	760		0.0314904	0.0661247	0.0594354									0.68019	6325	1048	482		0.147843	0.0385294	0.0481422
		0.620112	1636	1796	798		0.0452709	0.0929992	0.0624071									0.708531	8377	2033	324		0.195807	0.0747426	0.0323612
		0.644917	1936	2669	997		0.0535724	0.138204	0.0779698									0.736872	3022	2267	428		0.0706372	0.0833456	0.0427487
		0.669721	1416	4717	799		0.0391831	0.244252	0.0624853									0.765214	9523	3475	347		0.222594	0.127757	0.0346584
		0.694525	1379	3167	611		0.0381593	0.163991	0.0477829									0.793555	10393	3134	479		0.242929	0.115221	0.0478426
		0.71933	1952	8623	490		0.0540152	0.44651	0.0383202									0.821896	14893	3524	389		0.348114	0.129559	0.0388534
		0.744134	1173	6005	550		0.0324589	0.310947	0.0430124									0.850237	10553	6771	455		0.246669	0.248934	0.0454455
		0.768939	2909	4947	821		0.080497	0.256162	0.0642058									0.878579	12808	6647	478		0.299378	0.244375	0.0477427
		0.793743	2358	7255	926		0.0652499	0.375673	0.0724173									0.90692	7661	6577	430		0.179071	0.241801	0.0429485
		0.818548	2038	4589	646		0.0563949	0.237624	0.0505201									0.935261	12627	11328	368		0.295147	0.416471	0.0367559
		0.843352	1796	10421	860		0.0496984	0.539613	0.0672558									0.963602	19471	14920	499		0.455121	0.548529	0.0498402
		0.868157	1502	7252	929		0.0415629	0.375518	0.0726519									0.991944	16591	12036	501		0.387803	0.4425	0.05004
		0.892961	6323	10218	1115		0.174968	0.529101	0.0871979									1.02028	16525	14471	403		0.386261	0.532022	0.0402517
		0.917766	1318	10188	807		0.0364713	0.527548	0.063111									1.04863	15819	19204	215		0.369758	0.706029	0.0214742
		0.94257	1170	10914	670		0.0323759	0.565141	0.052397									1.07697	17144	16070	453		0.400729	0.590809	0.0452457
		0.967375	1170	10914	670		0.0323759	0.565141	0.052397									1.10531	23596	16256	569		0.55154	0.597647	0.0568318
		0.992179	3112	14158	829		0.0861143	0.733119	0.0648315									1.13365	13360	23582	341		0.312281	0.866985	0.0340591
		1.01698	2580	10975	1081		0.071393	0.5683	0.084539									1.16199	10333	15737	301		0.241527	0.578566	0.0300639
		1.04179	1749	11258	1459		0.0483978	0.582954	0.1141									1.19033	16602	17410	530		0.38806	0.640074	0.0529365
		1.06659	2550	13536	1696		0.0705628	0.700911	0.132635									1.21867	8561	19772	373		0.200108	0.726912	0.0372553
		1.0914	5150	14136	1533		0.142509	0.73198	0.119887									1.24701	5494	18678	509		0.128418	0.686691	0.050839
		1.1162	1481	19312	1214		0.0409818	1	0.0949402									1.27536	7189	20657	470		0.168038	0.759449	0.0469437
		1.14101	1381	11190	1954		0.0382146	0.579432	0.152811									1.3037	12116	23743	467		0.283203	0.872904	0.046644
		1.16581	1564	14700	1073		0.0432785	0.761185	0.0839133									1.33204	4153	27200	229		0.0970735	1	0.0228726
		1.19062	2698	11433	2437		0.0746583	0.592015	0.190584									1.36038	14623	23745	431		0.341803	0.872978	0.0430483
		1.21542	1479	12922	1310		0.0409264	0.669118	0.102448									1.38872	12540	19690	586		0.293114	0.723897	0.0585298
		1.24022	2596	15460	1723		0.0718357	0.800539	0.134746									1.41706	13791	26022	372		0.322355	0.956691	0.0371554
		1.26503	1396	12933	2208		0.0386297	0.669687	0.172675									1.4454	6053	27083	693		0.141485	0.995699	0.0692169
		1.28983	1390	13133	1790		0.0384637	0.680043	0.139986									1.47374	10753	25545	503		0.251344	0.939154	0.0502397
		1.31464	1390	13133	1790		0.0384637	0.680043	0.139986									1.50209	11221	23070	603		0.262283	0.848162	0.0602277
		1.33944	1711	14394	2375		0.0473463	0.74534	0.185736									1.53043	11059	24512	707		0.258497	0.901176	0.0706153
		1.36425	3580	11348	2479		0.0990647	0.587614	0.193869									1.55877	16547	16440	624		0.386775	0.604412	0.0623252
		1.38905	1118	13152	1796		0.030937	0.681027	0.140455									1.58711	12916	22282	830		0.301903	0.819191	0.0829005
		1.41386	1921	14156	1874		0.0531573	0.733016	0.146555									1.61545	23395	21889	696		0.546842	0.804743	0.0695166
		1.43866	2695	12519	3105		0.0745752	0.64825	0.242825									1.64379	14245	14537	927		0.332967	0.534449	0.0925889
		1.46346	4166	11765	3735		0.11528	0.609207	0.292094									1.67213	17074	18728	667		0.399093	0.688529	0.0666201
		1.48827	6827	9285	2945		0.188915	0.480789	0.230312									1.70047	26818	16491	701		0.626852	0.606287	0.070016
		1.51307	5314	12637	4219		0.147047	0.65436	0.329944									1.72882	26426	18706	654		0.61769	0.687721	0.0653216
		1.53788	6313	10691	3643		0.174691	0.553594	0.284899									1.75716	7673	17390	881		0.179351	0.639338	0.0879944
		1.56268	11990	10741	3954		0.331784	0.556183	0.30922									1.7855	9238	13877	744		0.215932	0.510184	0.0743108
		1.58749	13053	10866	6173		0.361199	0.562655	0.482756									1.81384	17202	10177	1477		0.402085	0.374154	0.147523
		1.61229	11613	12576	5768		0.321351	0.651201	0.451083									1.84218	42782	10310	1287		1	0.379044	0.128546
		1.6371	8118	14716	4974		0.224639	0.762013	0.388989									1.87052	24286	8988	1174		0.567669	0.330441	0.117259
		1.6619	17646	11711	6718		0.488295	0.606411	0.525377									1.89886	24475	11862	1490		0.572086	0.436103	0.148821
		1.6867	3618	11440	6914		0.100116	0.592378	0.540705									1.9272	28594	10308	2779		0.668365	0.378971	0.277567
		1.71151	8000	11658	5441		0.221374	0.603666	0.42551									1.95555	18460	10139	2248		0.43149	0.372757	0.224531
		1.73631	7013	11693	7697		0.194062	0.605478	0.601939									1.98389	13375	9799	2156		0.312631	0.360257	0.215342
		1.76112	22714	13314	9286		0.628535	0.689416	0.726206									2.01223	19527	10255	3993		0.45643	0.377022	0.398821
		1.78592	4894	15290	7975		0.135425	0.791736	0.62368									2.04057	26644	11123	3954		0.622785	0.408934	0.394926
		1.81073	12095	14064	8778		0.334689	0.728252	0.686478									2.06891	22141	11545	4666		0.517531	0.424449	0.466041
		1.83553	12095	14064	8778		0.334689	0.728252	0.686478									2.09725	30716	10160	4468		0.717965	0.373529	0.446264
		1.86034	11379	11780	10488		0.314876	0.609983	0.820208									2.12559	19385	11011	4806		0.453111	0.404816	0.480024
		1.88514	10003	14117	8982		0.2768	0.730996	0.702432									2.15393	18857	10096	5473		0.440769	0.371176	0.546644
		1.90995	7704	12748	9407		0.213183	0.660108	0.735669									2.18228	21729	8156	5916		0.507901	0.299853	0.590891
		1.93475	9749	10367	11175		0.269771	0.536816	0.873934									2.21062	9798	8016	5829		0.229022	0.294706	0.582201
		1.95955	11271	10880	11084		0.311888	0.56338	0.866818									2.23896	12781	10442	6123		0.298747	0.383897	0.611566
		1.98436	15636	6688	10083		0.432675	0.346313	0.788535									2.2673	16910	8320	7179		0.39526	0.305882	0.71704
		2.00916	7559	12127	9638		0.20917	0.627952	0.753734									2.29564	13511	8789	7749		0.31581	0.323125	0.773971
		2.03397	20664	8367	8840		0.571808	0.433254	0.691327									2.32398	20497	9203	6798		0.479103	0.338346	0.678985
		2.05877	15423	8124	10446		0.426781	0.420671	0.816923									2.35232	14686	7413	8184		0.343275	0.272537	0.817419
		2.08358	19505	6595	9501		0.539737	0.341498	0.74302									2.38066	12305	9267	8469		0.287621	0.340699	0.845885
		2.10838	19090	7458	9990		0.528253	0.386185	0.781262									2.40901	11522	9927	8894		0.269319	0.364963	0.888334
		2.13319	16080	7036	11391		0.444961	0.364333	0.890827									2.43735	6979	7885	7936		0.163129	0.28989	0.792649
		2.15799	17585	5373	10156		0.486607	0.278221	0.794244									2.46569	7449	11879	9249		0.174115	0.436728	0.923791
		2.18279	17585	5373	10156		0.486607	0.278221	0.794244									2.49403	10229	10796	7355		0.239096	0.396912	0.734618
		2.2076	14359	6208	9431		0.397338	0.321458	0.737546									2.52237	7165	10321	9320		0.167477	0.379449	0.930883
		2.2324	25870	4860	10940		0.715867	0.251657	0.855556									2.55071	3690	9133	7992		0.0862512	0.335772	0.798242
		2.25721	29049	3353	10566		0.803835	0.173623	0.826308									2.57905	4012	11276	7513		0.0937778	0.414559	0.7504
		2.28201	21730	6613	9782		0.601306	0.34243	0.764996									2.60739	6172	9494	8491		0.144266	0.349044	0.848082
		2.30682	20009	5843	10654		0.553683	0.302558	0.83319									2.63574	7414	8766	9010		0.173297	0.322279	0.89992
		2.33162	22566	6603	9026		0.62444	0.341912	0.705873									2.66408	8789	9953	8386		0.205437	0.365919	0.837595
		2.35643	11935	5638	12688		0.330262	0.291943	0.992258									2.69242	10912	12862	8233		0.255061	0.472868	0.822313
		2.38123	21675	6823	9719		0.599784	0.353304	0.760069									2.72076	12996	9046	8653		0.303773	0.332574	0.864263
		2.40603	28930	6180	9425		0.800542	0.320008	0.737077									2.7491	6615	9882	7983		0.154621	0.363309	0.797343
		2.43084	14681	7106	8997		0.406248	0.367958	0.703605									2.77744	9170	9262	8437		0.214342	0.340515	0.842689
		2.45564	13267	7699	11505		0.36712	0.398664	0.899742									2.80578	4396	9376	7930		0.102753	0.344706	0.79205
		2.48045	18083	7852	9608		0.500387	0.406587	0.751388									2.83412	5403	10737	7202		0.126291	0.394743	0.719337
		2.50525	18376	9213	10362		0.508495	0.477061	0.810354									2.86247	3064	10417	9175		0.0716189	0.382978	0.9164
		2.53006	10775	8346	9196		0.298163	0.432167	0.719168									2.89081	6868	9676	9016		0.160535	0.355735	0.900519
		2.55486	20264	7664	11019		0.560739	0.396852	0.861735									2.91915	5877	13110	9621		0.137371	0.481985	0.960947
		2.57967	26662	4936	11167		0.737783	0.255592	0.873309									2.94749	10329	8416	8937		0.241433	0.309412	0.892629
		2.60447	17682	5345	9814		0.489291	0.276771	0.767498									2.97583	8388	12812	10012		0.196064	0.471029	1
		2.62927	36138	6349	10290		1	0.328759	0.804724									3.00417	11789	9902	9605		0.27556	0.364044	0.959349
		2.65408	28140	4135	12787		0.778682	0.214116	1
		2.67888	14710	5508	10712		0.407051	0.285211	0.837726
		2.70369	14710	5508	10712		0.407051	0.285211	0.837726
		2.72849	22387	6975	10116		0.619486	0.361174	0.791116
		2.7533	19062	3897	11416		0.527478	0.201792	0.892782
		2.7781	18768	5247	12441		0.519343	0.271696	0.972941
		2.80291	24082	6568	11297		0.66639	0.340099	0.883475
		2.82771	14795	6080	10585		0.409403	0.31483	0.827794
		2.85252	12765	7481	9886		0.353229	0.387376	0.773129
		2.87732	14840	4006	10739		0.410648	0.207436	0.839837
		2.90212	15774	3958	11074		0.436493	0.20495	0.866036
		2.92693	4025	6659	9556		0.111379	0.344812	0.747321
		2.95173	9685	7481	12045		0.268	0.387376	0.941972
		2.97654	10988	4937	9534		0.304057	0.255644	0.745601
