# Supplementary material for: Autophagosome development and chloroplast segmentation occur synchronously for piecemeal degradation of chloroplasts
Source: eLife. 2024 Nov 7;12:RP93232. doi: 10.7554/eLife.93232 (PMC11542923; doi:10.7554/eLife.93232)
Supplement: Figure 3—source data 1. [file elife-93232-fig3-data1.xlsx]

## Sheet: Sheet1
Figure 3B_tracking speed
Time	Speed µm/s
0	0.327575
0.52	0.267699
1.04	0.163942
1.56	0.194352
2.08	0.287454
2.6	0.112651
3.12	0.154009
3.64	0.0981133
4.16	0.310701
4.68	0.139202
5.2	0.11894
5.72	0.165038
6.24	0.10937
6.76	0.0800894
7.28	0.0918181
7.8	0.155155
8.32	0.0340763
8.84	0.0552957
9.36	0.183882
9.88	0.0159774
10.4	0.193461
10.92	0.004385
11.44	0.0492008
11.96	0.118427
12.48	0.151497
13	0.0994601
13.52	0.0652605
14.04	0.066562
14.56	0.105964
15.08	0.124209
15.6	0.0924041
16.12	0.0380735
16.64	0.0835224
17.16	0.255827
17.68	0.164883
18.2	0.354858
18.72	0.243356
19.24	0.412997
19.76	0.376625
20.28	0.102395
20.8	0.309754
21.32	0.571273
21.84	0.662232
22.36	0.460391
22.88	0.140649
23.4	0.0498466
23.92	0.103021
24.44	0.220572
24.96	0.523573
25.48	0.725444
26	1.28778
26.52	1.54753
27.04	0.781528
27.56	0.58794
28.08	0.855426
28.6	0.835827
29.12	0.826678
29.64	0.950061
30.16	0.689922
30.68	0.575122
31.2	1.49392
31.72	2.03461
32.24	1.92426
32.76	1.19078
33.28	0.532541
33.8	0.912237
34.32	0.925569
34.84	0.166246
35.36	0.0986202
35.88	0.230406
36.4	0.02324
36.92	0.0364307
37.44	0.14775
37.96	0.111402
38.48	0.309962
39	0.332345
39.52	0.0531019
40.04	0.170064
40.56	0.0631257
41.08	0.0619849
41.6	0.0163072
42.12	0.0512684
42.64	0.0486955
43.16	0.191033
43.68	0.333967
44.2	0.36791
44.72	0.324383
45.24	0.0888225
45.76	0.110907
46.28	0.242361
46.8	0.361838
47.32	0.296467
47.84	0.0291568
48.36	0.0734452
48.88	0.400689
49.4	0.237527
49.92	0.0496885
50.44	0.171346
50.96	0.108332
51.48	0.17652
52	0.0378306
52.52	0.067196
53.04	0.132973
53.56	0.0746338
54.08	0.103107
54.6	0.0606293
55.12	0.0616338
55.64	0.0609715
56.16	0.0422394
56.68	0.0557719
57.2	0.125155
57.72	0.089947
58.24	0.142111
58.76	0.0644689
59.28	0.165667
59.8	0.0509747
60.32	0.0776433
60.84	0.12689
61.36	0.0640096
61.88	0.0639079
62.4	0.047655
62.92	0.0304393
63.44	0.0503902
63.96	0.172699
64.48	0.0540743
65	0.0953402
65.52	0.126871
66.04	0.160561
66.56	0.223112
67.08	0.117804
67.6	0.110547
68.12	0.111315
68.64	0.123613
69.16	0.0906287
69.68	0.0741913
70.2	0.0938409
70.72	0.158154
71.24	0.156595
71.76	0.125079
72.28	0.175218
72.8	0.216183
73.32	0.0745433
73.84	0.383222
74.36	0.957857
74.88	0.822679
75.4	0.782213
75.92	0.118612
76.44	0.142601
76.96	0.498012
77.48	0.360758
78	0.393323
78.52	0.504393
79.04	0.319754
79.56	0.859433
80.08	1.17027
80.6	0.195772
81.12	0.345029
81.64	0.724959
82.16	0.505463
82.68	0.506383
83.2	0.26576
83.72	0.684809
84.24	0.437889
84.76	1.36119
85.28	1.16407
85.8	0.697003
86.32	1.6296
86.84	0.409292
87.36	0.369854
87.88	0.92105
88.4	1.03515
88.92	0.986447
89.44	0.520509
89.96	0.707058
90.48	0.137836
