# Supplementary material for: Autophagosome development and chloroplast segmentation occur synchronously for piecemeal degradation of chloroplasts
Source: eLife. 2024 Nov 7;12:RP93232. doi: 10.7554/eLife.93232 (PMC11542923; doi:10.7554/eLife.93232)
Supplement: Figure 6—figure supplement 1—source data 1. [file elife-93232-fig6-figsupp1-data1.xlsx]

## Sheet: Sheet1
Figure 6-Figure supplement 1
Time	Bud area (µm2)	Minor axis (µm)	Major axis (µm)	Major/Minor
0	0	0.832617	1.85395	2.22665
2	0	0.82195	1.90112	2.31294
4	0	0.733207	1.842	2.51225
6	0	0.750709	1.83171	2.43997
8	0	0.795848	1.81151	2.2762
10	0	0.770692	1.87318	2.43052
12	0	0.78813	1.79976	2.28358
14	0	0.748774	1.8403	2.45775
16	0	0.772444	1.82964	2.36864
18	0	0.717739	1.91279	2.66502
20	0	0.774039	1.90063	2.45547
22	0	0.696395	1.88416	2.70559
24	0	0.787791	1.94651	2.47085
26	0	0.818018	1.84964	2.26112
28	0	0.776005	1.8516	2.38607
30	0	0.792241	1.85398	2.34017
32	0	0.847928	1.84208	2.17245
34	0	0.836532	1.80765	2.16089
36	0	0.856452	1.75062	2.04404
38	0	0.798414	1.81373	2.27167
40	0	0.785079	1.804	2.29786
42	0	0.759788	1.77638	2.33799
44	0	0.80621	1.74642	2.16621
46	0.291929	0.707013	1.69299	2.39457
48	0.660376	0.683292	1.44805	2.11923
50	0.708933	0.697162	1.56801	2.24913
52	0.791386	0.767424	1.6124	2.10106
54	0.910976	0.84751	1.59848	1.88609
56	0.432114	0.78994	1.57266	1.99086
58	0.257436	0.665368	1.51641	2.27905
60	0.263339	0.790243	1.66066	2.10145
62	0.447354	0.895029	1.6685	1.86419
64	0.815262	0.899651	1.5929	1.77058
66	0.789713	0.832541	1.49593	1.79682
68	1.16234	0.888116	1.44656	1.6288
70	1.3575	0.894858	1.37254	1.53381
72	1.50737	0.879322	1.12915	1.28411
74	0.835992	0.438101	0.614267	1.40211
76	0.905456	0.262152	0.284854	1.0866
78	1.10067	0.700627	1.11134	1.58621
80	1.55515	1.08922	1.32191	1.21363
82	1.84949	1.21812	1.23828	1.01655
84	1.62218	1.13348	1.24133	1.09515
86	1.7522	1.13961	1.32084	1.15903
88	1.57791	1.17591	1.22733	1.04373
90	1.55373	1.16886	1.24587	1.06588
92	1.673	1.21234	1.2388	1.02183
94	1.56112	1.26475	1.26504	1.00023
96	1.84171	1.24586	1.24483	0.999173
98	1.98651	1.24437	1.25774	1.01074
100	1.44723	1.03037	1.18676	1.15178
102	1.69222	1.0909	1.10534	1.01324
104	1.82098	0.95549	1.15267	1.20637
106	1.72717	1.01657	1.23424	1.21412
108	1.85672	1.07226	1.18639	1.10644
110	2.06017	1.12523	1.33765	1.18878
112	2.21112	1.05405	1.29394	1.22759
114	2.09536	1.05313	1.33588	1.26849
116	2.1153	1.08941	1.35101	1.24013
118	2.22103	1.07287	1.30587	1.21717
120	2.30212	1.04347	1.27673	1.22354
122	2.27272	1.0392	1.34778	1.29694
124	2.38083	1.07658	1.3153	1.22174
126	2.3168	0.965441	1.33645	1.38429
128	2.23706	1.04453	1.30286	1.24732
130	2.27467	1.12225	1.25063	1.1144
