# Supplementary material for: Autophagosome development and chloroplast segmentation occur synchronously for piecemeal degradation of chloroplasts
Source: eLife. 2024 Nov 7;12:RP93232. doi: 10.7554/eLife.93232 (PMC11542923; doi:10.7554/eLife.93232)
Supplement: Figure 6—figure supplement 3—source data 1. [file elife-93232-fig6-figsupp3-data1.xlsx]

## Sheet: Sheet1
Figure 6-Figure supplement 3C							Figure 6-Figure Supplement 3D					Figure 6-Figure Supplement 3E
Plant No.	Image _No.	Buds No.	GFP-ATG8a (+ or -)				treatment	ATG8positiveBuds (number)				genotype	ATG8positiveBuds (number)
1	1	1	+				Control	1				WT	5
1	2	2	+				Control	2				WT	14
1	2	3	-				Control	0				WT	10
1	4	4	+				Control	0				WT	2
1	4	5	+				Control	1				WT	12
1	4	6	-				Dark	7				WT	8
1	4	7	-				Dark	7				atg7	0
1	5	8	+				Dark	6				atg7	0
1	6	9	-				Dark	9				atg7	0
2	1	10	+				Dark	5				atg7	0
2	1	11	-									atg7	0
2	3	12	-									atg7	0
2	4	13	-					Mean
3	1	14	+				Control	0.8					Mean
3	2	15	+				Dark	6.8				atg7	0
3	2	16	-									WT	8.5
3	3	17	+				p-value(Prob>|t|)	<.0001
4	4	18	+									p-value (Prob>|t|)	0.0009
4	5	19	+
4	6	20	+
4	7	21	-
4	8	22	+
4	9	23	-
4	10	24	+
4	11	25	+
5	12	26	-
5	13	27	+
5	14	28	+
5	16	29	+
5	17	30	-
5	17	31	-
5	18	32	+
5	19	33	+
5	22	34	+
5	23	35	+
6	24	36	+
6	25	37	-
6	26	38	-
6	28	39	+
6	29	40	+
6	29	41	+
6	29	42	+
6	31	43	+
6	32	44	-
6	33	45	+
7	34	46	-
7	35	47	-
8	36	48	+
8	37	49	-
8	38	50	-
8	39	51	+
8	41	52	+
8	42	53	+
8	42	54	+
8	43	55	+
8	44	56	-
8	45	57	+
8	45	58	+	%
		GFP-ATG8a-	21	36.2069
		GFP-ATG8a+	37	63.7931
		Total	58
