# Supplementary material for: Autophagosome development and chloroplast segmentation occur synchronously for piecemeal degradation of chloroplasts
Source: eLife. 2024 Nov 7;12:RP93232. doi: 10.7554/eLife.93232 (PMC11542923; doi:10.7554/eLife.93232)
Supplement: Figure 6—figure supplement 4—source data 1. [file elife-93232-fig6-figsupp4-data1.xlsx]

## Sheet: Sheet1
Figure 6-Figure supplement 4D
Plant No.	Image No.	Type	buds No.
1	1	CPsurface	1
1	1	Others	2
1	2	CPbud	3
1	2	CPbud	4
1	3	Others	5
1	3	Others	6
1	3	Others	7
1	4	CPsurface	8
1	4	CPbud	9
1	5	CPbud	10
1	5	Others	11
1	6	CPsurface	12
1	6	Others	13
1	7	Others	14
1	7	Others	15
1	8	CPbud	16
1	8	Others	17
1	8	Others	18
2	1	Others	19
2	2	Others	20
2	3	Others	21
2	4	CPsurface	22
2	5	CPsurface	23
2	5	Others	24
2	5	Others	25
2	6	CPbud	26
2	7	Others	27
2	8	Others	28
3	1	Others	29
3	1	Others	30
3	2	CPsurface	31
3	3	CPsurface	32
3	4	CPbud	33
3	5	Others	34
3	6	Others	35
3	7	Others	36
3	8	Others	37
4	1	Others	38
4	2	Others	39
4	3	Others	40
4	3	CPsurface	41
4	4	Others	42
4	5	CPsurface	43
4	5	CPsurface	44
4	5	Others	45
4	6	Others	46
4	7	Others	47
4	7	Others	48
4	8	CPbud	49
4	8	Others	50
5	1	CPbud	51
5	2	CPsurface	52
5	3	Others	53
5	4	Others	54
5	5	CPbud	55
5	5	Others	56
5	6	Others	57
5	7	CPbud	58
5	8	CPbud	59
5	8	CPsurface	60
5	9	Others	61
6	1	Others	62
6	2	Others	63
6	3	Others	64
6	4	Others	65
6	5	CPbud	66
6	6	CPsurface	67
6	7	Others	68
6	8	Others	69
7	1	CPsurface	70
7	2	CPsurface	71
7	2	Others	72
7	2	Others	73
7	3	CPsurface	74
7	4	Others	75
7	4	Others	76
7	4	CPsurface	77
7	5	Others	78
7	6	Others	79
7	7	CPbud	80
7	8	CPsurface	81
7	9	CPsurface	82
7	9	Others	83
8	1	CPbud	84
8	2	Others	85
8	2	Others	86
8	3	CPsurface	87
8	4	CPbud	88
8	5	Others	89
8	6	Others	90
8	7	CPsurface	91
8	8	CPbud	92
8	8	CPsurface	93
8	9	Others	94
9	1	CPbud	95
9	1	CPbud	96
9	2	CPbud	97
9	2	Others	98
9	3	Others	99
9	3	Others	100
9	4	CPbud	101
9	5	Others	102
9	5	CPsurface	103
9	6	CPbud	104
9	7	CPbud	105
9	7	CPsurface	106
9	8	CPbud	107
10	1	CPbud	108
10	2	Others	109
10	2	Others	110
10	2	Others	111
10	2	CPsurface	112
10	3	Others	113
10	3	Others	114
10	3	Others	115
10	3	CPsurface	116
10	4	CPsurface	117
10	4	Others	118
10	4	Others	119
10	4	CPsurface	120
10	5	Others	121
10	5	CPsurface	122
10	5	CPbud	123
10	6	CPbud	124
10	7	Others	125
10	7	Others	126
10	7	Others	127
10	8	CPbud	128
11	1	Others	129
11	1	Others	130
11	1	Others	131
11	1	Others	132
11	2	Others	133
11	3	Others	134
11	4	Others	135
11	5	Others	136
11	6	Others	137
11	7	CPsurface	138
11	7	Others	139
11	8	Others	140
12	1	Others	141
12	2	CPsurface	142
12	3	CPsurface	143
12	4	Others	144
12	5	Others	145
12	6	CPsurface	146
12	7	Others	147
12	7	CPsurface	148
12	8	CPsurface	149
13	1	Others	150
13	2	CPbud	151
13	3	CPbud	152
13	4	Others	153
13	5	CPsurface	154
13	6	CPbud	155
13	7	Others	156
13	8	Others	157
			Relative	%
	Others	90	0.573248	57.3248
	Cpbud	31	0.197452	19.7452
	Cpsurface	36	0.229299	22.9299
	Total	157	1	100
