# Supplementary material for: Autophagosome development and chloroplast segmentation occur synchronously for piecemeal degradation of chloroplasts
Source: eLife. 2024 Nov 7;12:RP93232. doi: 10.7554/eLife.93232 (PMC11542923; doi:10.7554/eLife.93232)
Supplement: Figure 6—source data 1. [file elife-93232-fig6-data1.xlsx]

## Sheet: Sheet1
Figure 6C
Time	Bud area (µm2)	Minor axis µm	Major axis µm	Major/minor
0	0	0.701904	1.69531	2.4153
1	0	0.721527	1.80591	2.5029
2	0	0.764709	1.79883	2.35231
3	0	0.756866	1.84814	2.44183
4	0	0.760925	1.69873	2.23245
5	0	0.769196	1.78369	2.3189
6	0	0.808289	1.72534	2.13456
7	0	0.791321	1.7915	2.26394
8	0	0.751831	1.77734	2.36402
9	0	0.809052	1.82178	2.25175
10	0	0.764709	1.73218	2.26515
11	0	0.814972	1.77271	2.17518
12	0	0.734741	1.77661	2.41801
13	0	0.773346	1.70288	2.20196
14	0	0.847931	1.69897	2.00367
15	0	0.70166	1.46094	2.08212
16	0	0.729034	1.7915	2.45736
17	0	0.709961	1.60986	2.26753
18	0	0.682465	1.74878	2.56245
19	0	0.661224	1.63037	2.46568
20	0	0.707214	1.65698	2.34297
21	0	0.852386	1.80835	2.12152
22	0	0.7883	1.7229	2.18559
23	0	0.748444	1.75024	2.3385
24	0	0.752319	1.66772	2.21677
25	0	0.732758	1.64893	2.25031
26	0	0.715546	1.65625	2.31467
27	0	0.797241	1.71021	2.14516
28	0	0.743652	1.49683	2.01281
29	0	0.729797	1.58887	2.17714
30	0	0.654266	1.69092	2.58445
31	0	0.718323	1.74951	2.43555
32	0	0.73056	1.66357	2.27712
33	0	0.709564	1.69873	2.39405
34	0	0.630249	1.62573	2.5795
35	0	0.710785	1.68994	2.37757
36	0	0.735352	1.69824	2.30942
37	0	0.687286	1.47852	2.15124
38	0	0.68692	1.72412	2.50993
39	0	0.717346	1.60962	2.24385
40	0	0.792297	1.68213	2.12311
41	0	0.73172	1.70313	2.32757
42	0	0.71991	1.65942	2.30504
43	0	0.69809	1.65894	2.3764
44	0	0.834686	1.77319	2.12438
45	0	0.771225	1.78247	2.31122
46	0	0.686584	1.7251	2.51258
47	0	0.733459	1.65552	2.25714
48	0.507911	0.764542	1.75342	2.29343
49	0.975716	0.725983	1.62744	2.24171
50	0.597507	0.645782	1.6189	2.50688
51	0.809884	0.789154	1.53198	1.94129
52	0.228787	0.709213	1.5603	2.20004
53	0.793765	0.729034	1.58521	2.1744
54	0.776601	0.743225	1.6377	2.20351
55	1.02261	0.679901	1.54126	2.26689
56	0.881177	0.72821	1.67603	2.30158
57	1.13795	0.763214	1.61694	2.11859
58	0.754043	0.749756	1.7688	2.35917
59	0.769063	0.803101	1.58398	1.97233
60	1.02262	0.759003	1.47876	1.94829
61	0.843292	0.746765	1.60107	2.14401
62	0.634152	0.782959	1.6814	2.14749
63	0.877834	0.781219	1.5271	1.95477
64	0.903558	0.738159	1.58423	2.14619
65	0.727401	0.783844	1.60132	2.04291
66	0.964582	0.883301	1.60889	1.82145
67	1.10259	0.85376	1.50317	1.76065
68	0.804399	0.856995	1.62891	1.90072
69	1.13929	0.815277	1.43481	1.75991
70	1.08765	0.879303	1.53394	1.7445
71	0.876721	0.901123	1.64087	1.82092
72	0.854656	0.749451	1.52026	2.0285
73	0.846583	0.854858	1.5188	1.77667
74	1.08961	0.881592	1.59546	1.80975
75	1.01975	0.821899	1.53638	1.86931
76	1.08006	0.90741	1.52759	1.68346
77	0.597813	0.858185	1.49048	1.73678
78	1.16592	0.877472	1.30347	1.48548
79	0.828225	0.767731	1.37891	1.79608
80	1.15373	0.770386	1.39111	1.80573
81	0.917475	0.751556	1.29272	1.72006
82	0.619951	0.909119	1.36743	1.50413
83	0.9327	0.848145	1.46362	1.72567
84	1.32046	0.951233	1.38989	1.46115
85	1.12755	0.981049	1.50928	1.53843
86	1.60596	0.949585	1.38013	1.4534
87	1.60727	0.92334	1.38574	1.50079
88	1.64769	1.04224	1.38354	1.32747
89	1.80111	0.880554	1.26123	1.43231
90	1.31917	1.00659	1.23682	1.22872
91	1.25393	1.0365	1.35571	1.30797
92	1.42362	0.952881	1.11743	1.17269
93	1.57534	0.993439	1.25977	1.26809
94	1.23227	0.969147	1.27271	1.31323
95	1.54455	0.932922	1.19141	1.27707
96	1.64599	1.04907	1.19458	1.1387
97	1.3175	1.10815	1.18018	1.065
98	1.3831	1.03247	1.13452	1.09884
99	1.55649	1.07568	1.16675	1.08466
100	1.48852	1.13342	1.16602	1.02876
101	1.42449	1.08008	1.25037	1.15766
102	1.53073	1.1123	1.22461	1.10097
103	1.74211	0.969727	1.42532	1.46982
104	1.7556	0.953857	1.382	1.44885
105	1.6811	1.07739	1.366	1.26788
106	1.79222	1.0686	1.33319	1.2476
107	1.79613	1.02026	1.27643	1.25108
108	1.90273	1.02075	1.32056	1.29372
109	2.16395	1.02393	1.26721	1.23759
110	2.01183	0.939209	1.25635	1.33767
111	1.63243	1.01123	1.2428	1.229
112	1.73769	1.03247	1.27197	1.23197
113	2.02419	1.06445	1.30115	1.22237
114	2.009	1.00879	1.33936	1.32769
115	1.81844	1.02637	1.26904	1.23644
116	2.21914	1.0105	1.30823	1.29464
117	2.29135	1.18701	1.42322	1.199
118	2.5785	1.11084	1.48698	1.33861
119	2.78293	1.16064	1.42413	1.22702
120	2.37071	1.20605	1.5361	1.27366
121	2.19551	1.13647	1.34912	1.18711
122	2.44446	1.10327	1.35156	1.22505
123	2.39284	1.15454	1.44345	1.25024
124	2.49685	1.21606	1.40355	1.15418
125	2.46592	1.1582	1.27032	1.09681
126	2.58494	1.18237	1.34546	1.13793
127	2.33341	1.01172	1.13477	1.12162
128	2.72366	1.16626	1.38336	1.18615
129	2.85677	1.03101	1.37463	1.33328
130	2.41226	1.17407	1.43726	1.22417
131	2.88843	1.0813	1.32837	1.22849
132	2.41801	1.13281	1.39453	1.23104
133	2.727	1.09619	1.32813	1.21159
134	2.33923	1.12646	1.36938	1.21565
135	2.69051	1.12109	1.33362	1.18957
