# Supplementary figures and images for: Autophagosome development and chloroplast segmentation occur synchronously for piecemeal degradation of chloroplasts
Source: eLife journal article supplement (doi:10.7554/elife.93232), 2023-12-19

Anti-RFP

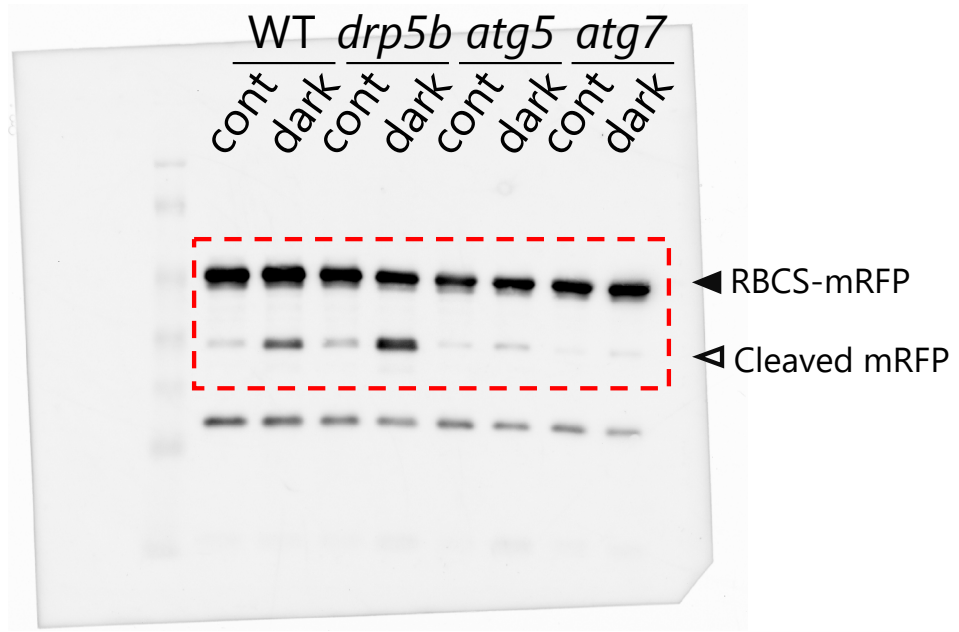

Anti-cFBPase

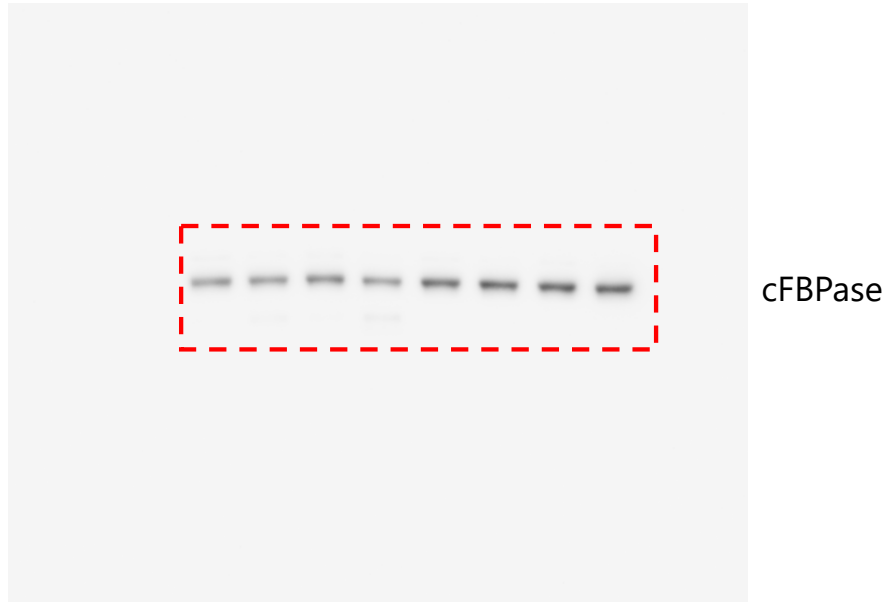

CBB stain

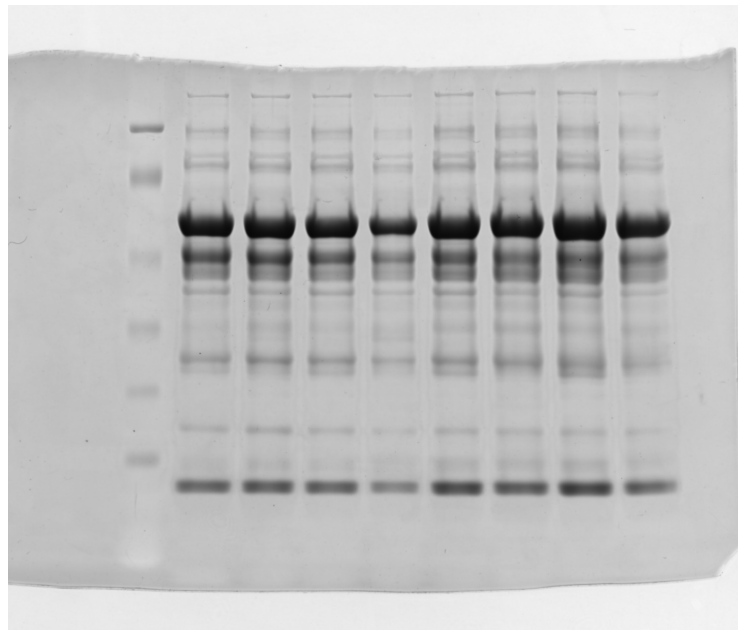

Supplement: fig8-data2 [file elife-93232-fig8-data2-v1.zip]
